# Supplementary material
Source: PubMed Central journal article supplement (PMC4640123)
Supplement: supp_mcv044_aob-14975-s01.pdf [file supp_mcv044_aob-14975-s01.pdf]

## SUPPLEMENTARY DATA

Table S1. Differences in annual mean temperature (°C) between current and LGM climate, and proportion of annual mean precipitation (mm) between LGM and current climate for the two global circulation models MIROC and CCSM, for the sampled *E. wandoo* populations in south-western Australia.

| Sampled population       | Changes in annual mean rainfall (% of present climate) |        | Changes in annual mean temperature (°C) between present climate and LGM |      |
|--------------------------|--------------------------------------------------------|--------|-------------------------------------------------------------------------|------|
|                          | MIROC                                                  | CCSM   | MIROC                                                                   | CCSM |
| Mt Lesueur NP            | 116.0%                                                 | 72.1%  | 1.6                                                                     | 2.3  |
| Bindoon east 1           | 120.4%                                                 | 71.8%  | 1.8                                                                     | 2.8  |
| Boyup Brook south        | 120.4%                                                 | 114.3% | 2.1                                                                     | 3.1  |
| Rocky Gully east         | 113.1%                                                 | 106.9% | 2.0                                                                     | 3.0  |
| Frankland west           | 104.1%                                                 | 100.8% | 2.0                                                                     | 3.0  |
| John Forrest NP          | 110.2%                                                 | 76.8%  | 1.8                                                                     | 3.0  |
| Gorrie Rd                | 108.5%                                                 | 90.6%  | 2.6                                                                     | 3.6  |
| Serpentine NP            | 123.1%                                                 | 95.0%  | 3.0                                                                     | 3.6  |
| Harvey Dam               | 98.1%                                                  | 86.7%  | 2.6                                                                     | 3.7  |
| Running Brook Rd         | 117.9%                                                 | 85.5%  | 1.8                                                                     | 3.0  |
| Namalcatchem NR          | 132.2%                                                 | 60.3%  | 2.5                                                                     | 3.6  |
| Boolanelling NR          | 126.4%                                                 | 64.7%  | 2.4                                                                     | 3.7  |
| Dookanooka NR            | 130.3%                                                 | 65.9%  | 2.0                                                                     | 2.7  |
| Quairading-York roadside | 135.1%                                                 | 77.9%  | 2.2                                                                     | 3.4  |
| Tutanning NR             | 121.3%                                                 | 77.3%  | 2.1                                                                     | 3.2  |
| Moora south              | 130.5%                                                 | 71.4%  | 2.4                                                                     | 3.2  |
| Dongolocking NR          | 110.7%                                                 | 72.8%  | 2.2                                                                     | 3.3  |
| Dryandra woodlands NP    | 125.5%                                                 | 93.6%  | 2.3                                                                     | 3.4  |
| Wingedyne NR             | 116.6%                                                 | 93.2%  | 2.4                                                                     | 3.5  |
| Highbury SF              | 116.9%                                                 | 88.5%  | 2.2                                                                     | 3.3  |
| Stirling Range NP east   | 104.2%                                                 | 82.3%  | 2.2                                                                     | 3.3  |
| Talbot Block north       | 131.5%                                                 | 86.6%  | 2.2                                                                     | 3.4  |
| Stirling Range NP west   | 111.9%                                                 | 94.5%  | 2.4                                                                     | 3.3  |
| Boyup Brook north        | 114.1%                                                 | 104.5% | 2.5                                                                     | 3.5  |
| Collie east              | 103.3%                                                 | 90.9%  | 2.7                                                                     | 3.7  |
| Boddington west          | 106.8%                                                 | 86.8%  | 2.2                                                                     | 3.3  |
| Mean changes             | 117.3%                                                 | 85.1%  | 2.2                                                                     | 3.3  |
| Max change               | 135.1%                                                 | 114.3% | 3.0                                                                     | 3.7  |
| Min change               | 98.1%                                                  | 60.3%  | 1.6                                                                     | 2.3  |
